# Supplementary material for: Identification of Genetic Variants Associated with Severe Myocardial Bridging through Whole-Exome Sequencing
Source: MDPI journal article supplement (doi:10.3390/jpm13101509), 2023-10-18
Supplement: s1 [file s1]

Supplement S3. Detailed Functional Annotation of SMB candidate genes.

| Enriched gene set                                             | Gene set size | Overlap genes | Gene Symbol                                                                                              | Gene Name                                                                                                                                                                                                                                                                                                                                                                                         |
|---------------------------------------------------------------|---------------|---------------|----------------------------------------------------------------------------------------------------------|---------------------------------------------------------------------------------------------------------------------------------------------------------------------------------------------------------------------------------------------------------------------------------------------------------------------------------------------------------------------------------------------------|
| <b>Knockout mouse phenotype</b>                               |               |               |                                                                                                          |                                                                                                                                                                                                                                                                                                                                                                                                   |
| Abnormal soleus morphology                                    | 21            | 4             | Myof<br>Ryr1<br>Sgca<br>Ttn                                                                              | myoferlin<br>ryanodine receptor 1, skeletal muscle<br>sarcoglycan, alpha<br>titin                                                                                                                                                                                                                                                                                                                 |
| Impaired skeletal muscle contractility                        | 38            | 6             | Col6a3<br>Dmd<br>Myh1<br>Ryr1<br>Sgca<br>Ttn                                                             | collagen, type VI, alpha 3<br>dystrophin, muscular dystrophy<br>myosin, heavy polypeptide 1, skeletal muscle, adult<br>ryanodine receptor 1, skeletal muscle<br>sarcoglycan, alpha<br>titin                                                                                                                                                                                                       |
| Absent startle reflex                                         | 39            | 5             | Adgrv1<br>Gpsm2<br>Kcnj10<br>Myh1<br>Pcdh15                                                              | adhesion G protein-coupled receptor V1<br>G-protein signalling modulator 2 (AGS3-like, <i>C. elegans</i> )<br>potassium inwardly-rectifying channel, subfamily J, member 10<br>myosin, heavy polypeptide 1, skeletal muscle, adult<br>protocadherin 15                                                                                                                                            |
| Decreased skeletal muscle mass                                | 107           | 8             | Col6a3<br>Dmd<br>Gaa<br>Myh1<br>Nf1<br>Polg<br>Ryr1<br>Ttn                                               | collagen, type VI, alpha 3<br>dystrophin, muscular dystrophy<br>glucosidase, alpha, acid<br>myosin, heavy polypeptide 1, skeletal muscle, adult<br>neurofibromin 1<br>polymerase (DNA directed), gamma<br>ryanodine receptor 1, skeletal muscle<br>titin                                                                                                                                          |
| Abnormal skeletal muscle mass                                 | 121           | 8             | Col6a3<br>Dmd<br>Gaa<br>Myh1<br>Nf1<br>Polg<br>Ryr1<br>Ttn                                               | collagen, type VI, alpha 3<br>dystrophin, muscular dystrophy<br>glucosidase, alpha, acid<br>myosin, heavy polypeptide 1, skeletal muscle, adult<br>neurofibromin 1<br>polymerase (DNA directed), gamma<br>ryanodine receptor 1, skeletal muscle<br>titin                                                                                                                                          |
| Abnormal muscle fiber morphology                              | 322           | 13            | Adgrv1<br>Cenpj<br>Col6a3<br>Dmd<br>Gaa<br>Myof<br>Opa1<br>Polg<br>Ryr1<br>Ryr2<br>Sgca<br>Trim63<br>Ttn | adhesion G protein-coupled receptor V1<br>centromere protein J<br>collagen, type VI, alpha 3<br>dystrophin, muscular dystrophy<br>glucosidase, alpha, acid<br>myoferlin<br>OPA1, mitochondrial dynamin like GTPase<br>polymerase (DNA directed), gamma<br>ryanodine receptor 1, skeletal muscle<br>ryanodine receptor 2, cardiac<br>sarcoglycan, alpha<br>tripartite motif-containing 63<br>titin |
| Increased or absent threshold for auditory brainstem response | 310           | 12            | Adgrv1<br>Dmd<br>Ewsr1<br>Gpsm2                                                                          | adhesion G protein-coupled receptor V1<br>dystrophin, muscular dystrophy<br>Ewing sarcoma breakpoint region 1<br>G-protein signalling modulator 2 (AGS3-like, <i>C. elegans</i> )                                                                                                                                                                                                                 |

|                                           |      |    |         |                                                               |
|-------------------------------------------|------|----|---------|---------------------------------------------------------------|
| Abnormal skeletal muscle morphology       | 381  | 14 | Il17rd  | interleukin 17 receptor D                                     |
|                                           |      |    | Kcnj10  | potassium inwardly-rectifying channel, subfamily J, member 10 |
|                                           |      |    | Myh1    | myosin, heavy polypeptide 1, skeletal muscle, adult           |
|                                           |      |    | Opa1    | OPA1, mitochondrial dynamin like GTPase                       |
|                                           |      |    | Otof    | otoferlin                                                     |
|                                           |      |    | Pcdh15  | protocadherin 15                                              |
|                                           |      |    | Polg    | polymerase (DNA directed), gamma                              |
|                                           |      |    | Zeb1    | zinc finger E-box binding homeobox 1                          |
|                                           |      |    | Col6a3  | collagen, type VI, alpha 3                                    |
|                                           |      |    | Dmd     | dystrophin, muscular dystrophy                                |
|                                           |      |    | Gaa     | glucosidase, alpha, acid                                      |
|                                           |      |    | Myh1    | myosin, heavy polypeptide 1, skeletal muscle, adult           |
|                                           |      |    | Myof    | myoferlin                                                     |
|                                           |      |    | Nf1     | neurofibromin 1                                               |
|                                           |      |    | Ntrk1   | neurotrophic tyrosine kinase, receptor, type 1                |
|                                           |      |    | Polg    | polymerase (DNA directed), gamma                              |
|                                           |      |    | Ryr1    | ryanodine receptor 1, skeletal muscle                         |
|                                           |      |    | Sgca    | sarcoglycan, alpha                                            |
|                                           |      |    | Trappc9 | trafficking protein particle complex 9                        |
|                                           |      |    | Trim63  | tripartite motif-containing 63                                |
|                                           |      |    | Ttn     | titin                                                         |
|                                           |      |    | Xdh     | xanthine dehydrogenase                                        |
|                                           |      |    | Abcc9   | ATP-binding cassette, sub-family C (CFTR/MRP), member 9       |
|                                           |      |    | Adcy9   | adenylate cyclase 9                                           |
|                                           |      |    | Arhgef4 | Rho guanine nucleotide exchange factor (GEF) 4                |
|                                           |      |    | Bbs5    | Bardet-Biedl syndrome 5 (human)                               |
|                                           |      |    | Cyp11b1 | cytochrome P450, family 11, subfamily b, polypeptide 1        |
|                                           |      |    | Ddost   | dolichyl-di-phosphooligosaccharide-protein glycotransferase   |
|                                           |      |    | Dmd     | dystrophin, muscular dystrophy                                |
|                                           |      |    | Dsc2    | desmocollin 2                                                 |
|                                           |      |    | Gaa     | glucosidase, alpha, acid                                      |
|                                           |      |    | Hcn4    | hyperpolarization-activated, cyclic nucleotide-gated K+ 4     |
| Abnormal cardiovascular system physiology | 1421 | 29 | Lrp5    | low density lipoprotein receptor-related protein 5            |
|                                           |      |    | Men1    | multiple endocrine neoplasia 1                                |
|                                           |      |    | Myof    | myoferlin                                                     |
|                                           |      |    | Nexn    | nexilin                                                       |
|                                           |      |    | Nf1     | neurofibromin 1                                               |
|                                           |      |    | Nox4    | NADPH oxidase 4                                               |
|                                           |      |    | Opa1    | OPA1, mitochondrial dynamin like GTPase                       |
|                                           |      |    | Pcnt    | pericentrin (kendrin)                                         |
|                                           |      |    | Pkd2    | polycystic kidney disease 2                                   |
|                                           |      |    | Psen2   | presenilin 2                                                  |
|                                           |      |    | Ryr2    | ryanodine receptor 2, cardiac                                 |
|                                           |      |    | Scn1a   | sodium channel, voltage-gated, type I, alpha                  |
|                                           |      |    | Sgca    | sarcoglycan, alpha                                            |
|                                           |      |    | Slc12a3 | solute carrier family 12, member 3                            |
|                                           |      |    | Tcf7l1  | transcription factor 7 like 1 (T cell specific, HMG box)      |
|                                           |      |    | Tgfbr2  | transforming growth factor, beta receptor II                  |
|                                           |      |    | Trappc9 | trafficking protein particle complex 9                        |
|                                           |      |    | Ttn     | titin                                                         |

|                                                 |      |    |         |                                                                      |
|-------------------------------------------------|------|----|---------|----------------------------------------------------------------------|
| Abnormal cardiovascular system morphology       | 1794 | 34 | Zeb1    | zinc finger E-box binding homeobox 1                                 |
|                                                 |      |    | Abcc9   | ATP-binding cassette, sub-family C (CFTR/MRP), member 9              |
|                                                 |      |    | Adcy9   | adenylate cyclase 9                                                  |
|                                                 |      |    | Arhgef4 | Rho guanine nucleotide exchange factor (GEF) 4                       |
|                                                 |      |    | Cenpj   | centromere protein J                                                 |
|                                                 |      |    | Cyp11b1 | cytochrome P450, family 11, subfamily b, polypeptide 1               |
|                                                 |      |    | Dhcr7   | 7-dehydrocholesterol reductase                                       |
|                                                 |      |    | Dmd     | dystrophin, muscular dystrophy                                       |
|                                                 |      |    | Flnb    | filamin, beta                                                        |
|                                                 |      |    | Gaa     | glucosidase, alpha, acid                                             |
|                                                 |      |    | Il17rd  | interleukin 17 receptor D                                            |
|                                                 |      |    | Lef1    | lymphoid enhancer binding factor 1                                   |
|                                                 |      |    | Lrp5    | low density lipoprotein receptor-related protein 5                   |
|                                                 |      |    | Men1    | multiple endocrine neoplasia 1                                       |
|                                                 |      |    | Mks1    | Meckel syndrome, type 1                                              |
|                                                 |      |    | Nexn    | nexilin                                                              |
|                                                 |      |    | Nf1     | neurofibromin 1                                                      |
|                                                 |      |    | Nox4    | NADPH oxidase 4                                                      |
|                                                 |      |    | Opa1    | OPA1, mitochondrial dynamin like GTPase                              |
|                                                 |      |    | Palb2   | partner and localizer of BRCA2                                       |
|                                                 |      |    | Pcnt    | pericentrin (kendrin)                                                |
|                                                 |      |    | Polg    | polymerase (DNA directed), gamma                                     |
|                                                 |      |    | Ryr1    | ryanodine receptor 1, skeletal muscle                                |
|                                                 |      |    | Ryr2    | ryanodine receptor 2, cardiac                                        |
|                                                 |      |    | Sgca    | sarcoglycan, alpha                                                   |
|                                                 |      |    | Slc2a10 | solute carrier family 2 (facilitated glucose transporter), member 10 |
|                                                 |      |    | Smad9   | SMAD family member 9                                                 |
|                                                 |      |    | Tcf7l1  | transcription factor 7 like 1 (T cell specific, HMG box)             |
|                                                 |      |    | Tgfb2   | transforming growth factor, beta receptor II                         |
|                                                 |      |    | Trappc9 | trafficking protein particle complex 9                               |
|                                                 |      |    | Trim63  | tripartite motif-containing 63                                       |
|                                                 |      |    | Ttn     | titin                                                                |
|                                                 |      |    | Wdr11   | WD repeat domain 11                                                  |
|                                                 |      |    | Zeb1    | zinc finger E-box binding homeobox 1                                 |
| KEGG pathway                                    |      |    |         |                                                                      |
| Arrhythmogenic right ventricular cardiomyopathy | 72   | 7  | ACTN2   | actinin alpha 2                                                      |
|                                                 |      |    | DSC2    | desmocollin 2                                                        |
|                                                 |      |    | DMD     | dystrophin                                                           |
|                                                 |      |    | LEF1    | lymphoid enhancer binding factor 1                                   |
|                                                 |      |    | RYR2    | ryanodine receptor 2                                                 |
|                                                 |      |    | SGCA    | sarcoglycan alpha                                                    |
|                                                 |      |    | TCF7L1  | transcription factor 7 like 1                                        |
| GO term categories                              |      |    |         |                                                                      |
| Detection of mechanical stimulus                | 43   | 6  | ADGRV1  | adhesion G protein-coupled receptor V1                               |
|                                                 |      |    | ANO3    | anoctamin 3                                                          |
|                                                 |      |    | NTRK1   | neurotrophic receptor tyrosine kinase 1                              |
|                                                 |      |    | PKD2    | polycystin 2                                                         |
|                                                 |      |    | SCN1A   | sodium voltage-gated channel alpha subunit 1                         |
|                                                 |      |    | TTN     | titin                                                                |
| Muscle contraction                              | 339  | 14 | ACTN2   | actinin alpha 2                                                      |
|                                                 |      |    | DMD     | dystrophin                                                           |
|                                                 |      |    | DSC2    | desmocollin 2                                                        |
|                                                 |      |    | ENO1    | enolase 1                                                            |
|                                                 |      |    | GAA     | glucosidase alpha, acid                                              |

|                                          |     |    |          |                                                                         |
|------------------------------------------|-----|----|----------|-------------------------------------------------------------------------|
| Muscle system process                    | 423 | 14 | HCN4     | hyperpolarization activated cyclic nucleotide gated potassium channel 4 |
|                                          |     |    | MYH1     | myosin heavy chain 1                                                    |
|                                          |     |    | MYOF     | myoferlin                                                               |
|                                          |     |    | RYR1     | ryanodine receptor 1                                                    |
|                                          |     |    | RYR2     | ryanodine receptor 2                                                    |
|                                          |     |    | SCN1A    | sodium voltage-gated channel alpha subunit 1                            |
|                                          |     |    | SGCA     | sarcoglycan alpha                                                       |
|                                          |     |    | TRIM63   | tripartite motif containing 63                                          |
|                                          |     |    | TTN      | titin                                                                   |
|                                          |     |    | ACTN2    | actinin alpha 2                                                         |
|                                          |     |    | DMD      | dystrophin                                                              |
|                                          |     |    | DSC2     | desmocollin 2                                                           |
|                                          |     |    | ENO1     | enolase 1                                                               |
|                                          |     |    | GAA      | glucosidase alpha, acid                                                 |
| Monovalent inorganic cation transport    | 513 | 15 | HCN4     | hyperpolarization activated cyclic nucleotide gated potassium channel 4 |
|                                          |     |    | MYH1     | myosin heavy chain 1                                                    |
|                                          |     |    | MYOF     | myoferlin                                                               |
|                                          |     |    | RYR1     | ryanodine receptor 1                                                    |
|                                          |     |    | RYR2     | ryanodine receptor 2                                                    |
|                                          |     |    | SCN1A    | sodium voltage-gated channel alpha subunit 1                            |
|                                          |     |    | SGCA     | sarcoglycan alpha                                                       |
|                                          |     |    | TRIM63   | tripartite motif containing 63                                          |
|                                          |     |    | TTN      | titin                                                                   |
|                                          |     |    | ABCB11   | ATP binding cassette subfamily B member 11                              |
|                                          |     |    | ABCC9    | ATP binding cassette subfamily C member 9                               |
|                                          |     |    | ACTN2    | actinin alpha 2                                                         |
|                                          |     |    | ANK3     | ankyrin 3                                                               |
|                                          |     |    | DMD      | dystrophin                                                              |
| Inorganic cation transmembrane transport | 722 | 19 | DPP10    | dipeptidyl peptidase like 10                                            |
|                                          |     |    | HCN4     | hyperpolarization activated cyclic nucleotide gated potassium channel 4 |
|                                          |     |    | KCNJ10   | potassium voltage-gated channel subfamily J member 10                   |
|                                          |     |    | KCNJ18   | potassium voltage-gated channel subfamily J member 18                   |
|                                          |     |    | PKD2     | polycystin 2                                                            |
|                                          |     |    | SCN1A    | sodium voltage-gated channel alpha subunit 1                            |
|                                          |     |    | SLC12A3  | solute carrier family 12 member 3                                       |
|                                          |     |    | SLC24A5  | solute carrier family 24 member 5                                       |
|                                          |     |    | SLC25A22 | solute carrier family 25 member 22                                      |
|                                          |     |    | SLC2A10  | solute carrier family 2 member 10                                       |
|                                          |     |    | ABCB11   | ATP binding cassette subfamily B member 11                              |
|                                          |     |    | ABCC9    | ATP binding cassette subfamily C member 9                               |
|                                          |     |    | ACTN2    | actinin alpha 2                                                         |
|                                          |     |    | ANK3     | ankyrin 3                                                               |
|                                          |     |    | DMD      | dystrophin                                                              |
|                                          |     |    | DPP10    | dipeptidyl peptidase like 10                                            |
|                                          |     |    | HCN4     | hyperpolarization activated cyclic nucleotide gated potassium channel 4 |
|                                          |     |    | KCNJ10   | potassium voltage-gated channel subfamily J member 10                   |
|                                          |     |    | KCNJ18   | potassium voltage-gated channel subfamily J member 18                   |
|                                          |     |    | OPA1     | OPA1, mitochondrial dynamin like GTPase                                 |
|                                          |     |    | PKD2     | polycystin 2                                                            |
|                                          |     |    | RYR1     | ryanodine receptor 1                                                    |
|                                          |     |    | RYR2     | ryanodine receptor 2                                                    |

|                                       |     |    |          |                                                                         |
|---------------------------------------|-----|----|----------|-------------------------------------------------------------------------|
| Cation transmembrane transport        | 810 | 20 | SCN1A    | sodium voltage-gated channel alpha subunit 1                            |
|                                       |     |    | SLC12A3  | solute carrier family 12 member 3                                       |
|                                       |     |    | SLC24A5  | solute carrier family 24 member 5                                       |
|                                       |     |    | SLC25A22 | solute carrier family 25 member 22                                      |
|                                       |     |    | SLC2A10  | solute carrier family 2 member 10                                       |
|                                       |     |    | ZDHHC17  | zinc finger DHHC-type containing 17                                     |
|                                       |     |    | ABCB11   | ATP binding cassette subfamily B member 11                              |
|                                       |     |    | ABCC9    | ATP binding cassette subfamily C member 9                               |
|                                       |     |    | ACTN2    | actinin alpha 2                                                         |
|                                       |     |    | ANK3     | ankyrin 3                                                               |
|                                       |     |    | DMD      | dystrophin                                                              |
|                                       |     |    | DPP10    | dipeptidyl peptidase like 10                                            |
|                                       |     |    | HCN4     | hyperpolarization activated cyclic nucleotide gated potassium channel 4 |
|                                       |     |    | KCNJ10   | potassium voltage-gated channel subfamily J member 10                   |
|                                       |     |    | KCNJ18   | potassium voltage-gated channel subfamily J member 18                   |
|                                       |     |    | OPA1     | OPA1, mitochondrial dynamin like GTPase                                 |
|                                       |     |    | PKD2     | polycystin 2                                                            |
|                                       |     |    | RYR1     | ryanodine receptor 1                                                    |
|                                       |     |    | RYR2     | ryanodine receptor 2                                                    |
|                                       |     |    | SCN1A    | sodium voltage-gated channel alpha subunit 1                            |
| Metal ion transport                   | 841 | 20 | SLC12A3  | solute carrier family 12 member 3                                       |
|                                       |     |    | SLC24A5  | solute carrier family 24 member 5                                       |
|                                       |     |    | SLC25A15 | solute carrier family 25 member 15                                      |
|                                       |     |    | SLC25A22 | solute carrier family 25 member 22                                      |
|                                       |     |    | SLC2A10  | solute carrier family 2 member 10                                       |
|                                       |     |    | ZDHHC17  | zinc finger DHHC-type containing 17                                     |
|                                       |     |    | ABCB11   | ATP binding cassette subfamily B member 11                              |
|                                       |     |    | ABCC9    | ATP binding cassette subfamily C member 9                               |
|                                       |     |    | ACTN2    | actinin alpha 2                                                         |
|                                       |     |    | ANK3     | ankyrin 3                                                               |
|                                       |     |    | DMD      | dystrophin                                                              |
|                                       |     |    | DPP10    | dipeptidyl peptidase like 10                                            |
|                                       |     |    | HCN4     | hyperpolarization activated cyclic nucleotide gated potassium channel 4 |
|                                       |     |    | HEPHL1   | hephaestin like 1                                                       |
|                                       |     |    | KCNJ10   | potassium voltage-gated channel subfamily J member 10                   |
|                                       |     |    | KCNJ18   | potassium voltage-gated channel subfamily J member 18                   |
|                                       |     |    | OPA1     | OPA1, mitochondrial dynamin like GTPase                                 |
|                                       |     |    | PKD2     | polycystin 2                                                            |
|                                       |     |    | PSEN2    | presenilin 2                                                            |
|                                       |     |    | RYR1     | ryanodine receptor 1                                                    |
| Inorganic ion transmembrane transport | 808 | 19 | RYR2     | ryanodine receptor 2                                                    |
|                                       |     |    | SCN1A    | sodium voltage-gated channel alpha subunit 1                            |
|                                       |     |    | SLC12A3  | solute carrier family 12 member 3                                       |
|                                       |     |    | SLC24A5  | solute carrier family 24 member 5                                       |
|                                       |     |    | WFS1     | wolframin ER transmembrane glycoprotein                                 |
|                                       |     |    | ZDHHC17  | zinc finger DHHC-type containing 17                                     |
|                                       |     |    | ABCB11   | ATP binding cassette subfamily B member 11                              |
|                                       |     |    | ABCC9    | ATP binding cassette subfamily C member 9                               |
|                                       |     |    | ACTN2    | actinin alpha 2                                                         |
|                                       |     |    | ANK3     | ankyrin 3                                                               |
|                                       |     |    | DMD      | dystrophin                                                              |
|                                       |     |    | DPP10    | dipeptidyl peptidase like 10                                            |
|                                       |     |    | HCN4     | hyperpolarization activated cyclic nucleotide gated potassium channel 4 |

|                  |      |    |          |                                                                         |
|------------------|------|----|----------|-------------------------------------------------------------------------|
| Cation transport | 1111 | 23 | KCNJ10   | potassium voltage-gated channel subfamily J member 10                   |
|                  |      |    | KCNJ18   | potassium voltage-gated channel subfamily J member 18                   |
|                  |      |    | OPA1     | OPA1, mitochondrial dynamin like GTPase                                 |
|                  |      |    | PKD2     | polycystin 2                                                            |
|                  |      |    | RYR1     | ryanodine receptor 1                                                    |
|                  |      |    | RYR2     | ryanodine receptor 2                                                    |
|                  |      |    | SCN1A    | sodium voltage-gated channel alpha subunit 1                            |
|                  |      |    | SLC12A3  | solute carrier family 12 member 3                                       |
|                  |      |    | SLC24A5  | solute carrier family 24 member 5                                       |
|                  |      |    | SLC25A22 | solute carrier family 25 member 22                                      |
|                  |      |    | SLC2A10  | solute carrier family 2 member 10                                       |
|                  |      |    | ZDHHC17  | zinc finger DHHC-type containing 17                                     |
|                  |      |    | ABCB11   | ATP binding cassette subfamily B member 11                              |
|                  |      |    | ABCC9    | ATP binding cassette subfamily C member 9                               |
|                  |      |    | ACTN2    | actinin alpha 2                                                         |
|                  |      |    | ANK3     | ankyrin 3                                                               |
|                  |      |    | DMD      | dystrophin                                                              |
|                  |      |    | DPP10    | dipeptidyl peptidase like 10                                            |
|                  |      |    | HCN4     | hyperpolarization activated cyclic nucleotide gated potassium channel 4 |
|                  |      |    | HEPHL1   | hephaestin like 1                                                       |
|                  |      |    | KCNJ10   | potassium voltage-gated channel subfamily J member 10                   |
|                  |      |    | KCNJ18   | potassium voltage-gated channel subfamily J member 18                   |
| Ion transport    | 1608 | 29 | OPA1     | OPA1, mitochondrial dynamin like GTPase                                 |
|                  |      |    | PKD2     | polycystin 2                                                            |
|                  |      |    | PSEN2    | presenilin 2                                                            |
|                  |      |    | RYR1     | ryanodine receptor 1                                                    |
|                  |      |    | RYR2     | ryanodine receptor 2                                                    |
|                  |      |    | SCN1A    | sodium voltage-gated channel alpha subunit 1                            |
|                  |      |    | SLC12A3  | solute carrier family 12 member 3                                       |
|                  |      |    | SLC24A5  | solute carrier family 24 member 5                                       |
|                  |      |    | SLC25A22 | solute carrier family 25 member 22                                      |
|                  |      |    | SLC2A10  | solute carrier family 2 member 10                                       |
|                  |      |    | WFS1     | wolframin ER transmembrane glycoprotein                                 |
|                  |      |    | ZDHHC17  | zinc finger DHHC-type containing 17                                     |
|                  |      |    | ABCB11   | ATP binding cassette subfamily B member 11                              |
|                  |      |    | ABCC9    | ATP binding cassette subfamily C member 9                               |
|                  |      |    | ABCD1    | ATP binding cassette subfamily D member 1                               |
|                  |      |    | ACTN2    | actinin alpha 2                                                         |
|                  |      |    | ANK3     | ankyrin 3                                                               |
|                  |      |    | ANO3     | anoctamin 3                                                             |
|                  |      |    | CHRNA2   | cholinergic receptor nicotinic alpha 2 subunit                          |
|                  |      |    | CYB5R1   | cytochrome b5 reductase 1                                               |
|                  |      |    | CYB5RL   | cytochrome b5 reductase like                                            |
|                  |      |    | DMD      | dystrophin                                                              |
|                  |      |    | DPP10    | dipeptidyl peptidase like 10                                            |
|                  |      |    | HCN4     | hyperpolarization activated cyclic nucleotide gated potassium channel 4 |
|                  |      |    | HEPHL1   | hephaestin like 1                                                       |
|                  |      |    | KCNJ10   | potassium voltage-gated channel subfamily J member 10                   |
|                  |      |    | KCNJ18   | potassium voltage-gated channel subfamily J member 18                   |
|                  |      |    | NF1      | neurofibromin 1                                                         |
|                  |      |    | OPA1     | OPA1, mitochondrial dynamin like GTPase                                 |

---

|          |                                              |
|----------|----------------------------------------------|
| PKD2     | polycystin 2                                 |
| PSEN2    | presenilin 2                                 |
| RYR1     | ryanodine receptor 1                         |
| RYR2     | ryanodine receptor 2                         |
| SCN1A    | sodium voltage-gated channel alpha subunit 1 |
| SLC12A3  | solute carrier family 12 member 3            |
| SLC24A5  | solute carrier family 24 member 5            |
| SLC25A15 | solute carrier family 25 member 15           |
| SLC25A22 | solute carrier family 25 member 22           |
| SLC2A10  | solute carrier family 2 member 10            |
| WFS1     | wolframin ER transmembrane glycoprotein      |
| ZDHHC17  | zinc finger DHHC-type containing 17          |

---

FDR, false discovery rate; KEGG, Kyoto Encyclopedia of Genes and Genomes; GO, Gene Ontology
