# Supplementary material for: Identification of Genetic Variants Associated with Severe Myocardial Bridging through Whole-Exome Sequencing
Source: MDPI journal article supplement (doi:10.3390/jpm13101509), 2023-10-18
Supplement: s1 [file s1]

| Supplement S1. Baseline Characteristics of Subjects with Severe Myocardial Bridging or Normal Controls |        |             |                    |                                      |                               |
|--------------------------------------------------------------------------------------------------------|--------|-------------|--------------------|--------------------------------------|-------------------------------|
| Sample                                                                                                 | Gender | Age (years) | Bridge length (mm) | Residual diameter during systole (%) | Luminal area<br>reduction (%) |
| Patient 1 with SMB                                                                                     | M      | 43          | 22.2               | 39.4                                 | 84.5                          |
| Patient 2 with SMB                                                                                     | F      | 43          | 21.6               | 28.3                                 | 92.0                          |
| Patient 3 with SMB                                                                                     | F      | 59          | 9.5                | 36.0                                 | 87.0                          |
| Patient 4 with SMB                                                                                     | M      | 50          | 40.0               | 36.7                                 | 86.5                          |
| Patient 5 with SMB                                                                                     | F      | 53          | 11.8               | 33.2                                 | 89.0                          |
| Patient 6 with SMB                                                                                     | M      | 41          | 12.4               | 34.9                                 | 87.8                          |
| Patient 7 with SMB                                                                                     | F      | 64          | 14.8               | 22.4                                 | 94.0                          |
| Patient 8 with SMB                                                                                     | M      | 44          | 22.3               | 17.9                                 | 96.8                          |

|                  |   |    |   |   |   |
|------------------|---|----|---|---|---|
| Normal control 1 | M | 42 | - | - | - |
| Normal control 2 | F | 44 | - | - | - |
| Normal control 3 | F | 52 | - | - | - |
| Normal control 4 | M | 50 | - | - | - |
| Normal control 5 | F | 51 | - | - | - |
| Normal control 6 | M | 42 | - | - | - |
| Normal control 7 | F | 60 | - | - | - |
| Normal control 8 | M | 38 | - | - | - |

---

Normal control subjects do not have any myocardial bridging or any type of coronary artery disease. SMB, severe myocardial bridging; Subj., subject; M, male; F, female; MB, myocardial bridging.
