# Supplementary material for: Identification of Genetic Variants Associated with Severe Myocardial Bridging through Whole-Exome Sequencing
Source: MDPI journal article supplement (doi:10.3390/jpm13101509), 2023-10-18
Supplement: s1 [file s1]

Supplement S2. Rare Variants Potentially Pathogenic for Severe Myocardial Bridging

| Chr | Position  | Ref        | Alt | Gene    | Type                | rs number   | ClinVar           | CADD  | REVEL | TWB | AF     |
|-----|-----------|------------|-----|---------|---------------------|-------------|-------------------|-------|-------|-----|--------|
| 1   | 236749160 | C          | T   | ACTN2   | ns SNV              | rs573836993 | CIP               | 14.08 | 0.097 | N/A |        |
| 1   | 240493438 | G          | A   | GREM2   | ns SNV              | rs373941682 | Pathogenic        | 22.9  | 0.031 |     | 0.002  |
| 1   | 160041491 | G          | A   | KCNJ10  | ns SNV              | rs137853074 | CIP               | 23.6  | 0.522 |     | 0.0035 |
| 1   | 77926863  | C          | T   | NEXN    | ns SNV              | rs146245480 | CIP               | 32    | 0.211 |     | 0.0075 |
| 1   | 26913775  | AGGTGCGATG | -   | NR0B2   | frameshift deletion | rs540387719 | Likely_pathogenic | N/A   | N/A   |     | N/A    |
| 1   | 156868588 | C          | T   | NTRK1   | ns SNV              | rs202030811 | CIP               | 33    | 0.089 |     | 0.0045 |
| 1   | 226882007 | G          | A   | PSEN2   | ns SNV              | rs200636353 | CIP               | 18.56 | 0.331 |     | 0.0055 |
| 1   | 237614742 | G          | A   | RYR2    | ns SNV              | rs761770946 | CIP               | 10.76 | 0.181 |     | 0.005  |
| 1   | 202963091 | C          | A   | CYB5R1  | ns SNV              | rs368686887 | N/A               | 35    | 0.86  |     | 0.0015 |
| 1   | 54190767  | C          | T   | CYB5RL  | ns SNV              | rs191854671 | N/A               | 32    | 0.762 |     | 0.0015 |
| 1   | 20652503  | G          | A   | DDOST   | ns SNV              | rs530990753 | N/A               | 33    | 0.837 |     | 0.001  |
| 1   | 8863299   | T          | A   | ENO1    | ns SNV              | N/A         | N/A               | 34    | 0.806 |     | N/A    |
| 1   | 108929794 | C          | T   | GPSM2   | ns SNV              | rs189033496 | U/S               | 35    | 0.842 |     | 0.003  |
| 1   | 161120221 | G          | C   | NIT1    | ns SNV              | rs201971149 | N/A               | 26.1  | 0.818 |     | 0.002  |
| 1   | 233200177 | T          | C   | PCNX2   | ns SNV              | rs775218559 | N/A               | 29.1  | 0.775 |     | N/A    |
| 1   | 226888902 | G          | T   | PSEN2   | ns SNV              | rs574125890 | U/S               | 25.4  | 0.945 |     | 0.006  |
| 1   | 26066382  | A          | G   | TRIM63  | ns SNV              | rs758754060 | N/A               | 32    | 0.894 |     | N/A    |
| 2   | 237388032 | C          | T   | COL6A3  | ns SNV              | rs115729513 | CIP               | 20.2  | 0.178 |     | 0.0035 |
| 2   | 178548927 | T          | C   | TTN     | ns SNV              | rs186234393 | CIP               | 13.78 | 0.496 |     | 0.0035 |
| 2   | 178561041 | C          | T   | TTN     | ns SNV              | rs376283153 | CIP               | 18.93 | 0.14  |     | N/A    |
| 2   | 178565578 | G          | A   | TTN     | ns SNV              | rs185887755 | CIP               | 20.8  | 0.533 |     | 0.0065 |
| 2   | 98121411  | G          | T   | VWA3B   | stopgain            | rs139296152 | CIP               | 25.4  | N/A   |     | 0.0055 |
| 2   | 31381723  | C          | T   | XDH     | ns SNV              | rs192453952 | CIP               | 13.23 | 0.025 |     | 0.0075 |
| 2   | 168944720 | C          | T   | ABCB11  | ns SNV              | rs376255350 | U/S               | 35    | 0.907 |     | N/A    |
| 2   | 131043572 | T          | A   | ARHGEF4 | ns SNV              | rs750383856 | N/A               | 28.9  | 0.838 |     | 0.0005 |
| 2   | 169493760 | T          | C   | BBS5    | ns SNV              | rs758508869 | U/S               | 31    | 0.757 |     | N/A    |
| 2   | 115689911 | G          | A   | DPP10   | ns SNV              | rs200502140 | N/A               | 31    | 0.785 |     | 0.0015 |
| 2   | 219238272 | C          | T   | GLB1L   | ns SNV              | rs191524819 | N/A               | 35    | 0.852 |     | 0.0005 |
| 2   | 127574021 | A          | C   | MYO7B   | ns SNV              | rs559170047 | N/A               | 26.7  | 0.763 |     | 0.0015 |
| 2   | 26463969  | C          | G   | OTOF    | ns SNV              | rs199766465 | N/A               | 32    | 0.85  |     | 0.007  |
| 2   | 165994164 | C          | T   | SCN1A   | ns SNV              | rs121918808 | Likely_benign     | 32    | 0.817 |     | 0.0025 |
| 2   | 166041286 | A          | G   | SCN1A   | ns SNV              | rs773695263 | CIP               | 25.9  | 0.884 |     | N/A    |
| 2   | 85302590  | T          | C   | TCF7L1  | ns SNV              | N/A         | N/A               | 27.1  | 0.871 |     | N/A    |

|    |             |           |         |                         |             |               |       |       |        |
|----|-------------|-----------|---------|-------------------------|-------------|---------------|-------|-------|--------|
| 3  | 57106133 G  | A         | IL17RD  | ns SNV                  | rs200088377 | CIP           | 26.9  | 0.302 | 0.002  |
| 3  | 101245963 G | C         | IMPG2   | ns SNV                  | rs201905772 | CIP           | 12.7  | 0.062 | 0.0075 |
| 3  | 130563212 A | G         | COL6A6  | ns SNV                  | rs527993234 | N/A           | 23.1  | 0.889 | 0.0025 |
| 3  | 98580756 T  | C         | CPOX    | ns SNV                  | rs143456081 | Likely_benign | 23.8  | 0.865 | 0.0035 |
| 3  | 58008647 A  | T         | FLNB    | ns SNV                  | N/A         | N/A           | 32    | 0.953 | N/A    |
| 3  | 58154853 C  | T         | FLNB    | ns SNV                  | rs369477886 | N/A           | 34    | 0.876 | N/A    |
| 3  | 52694955 A  | G         | GLT8D1  | ns SNV                  | rs567530025 | N/A           | 29.5  | 0.975 | 0.0005 |
| 3  | 193637229 A | G         | OPA1    | ns SNV                  | N/A         | N/A           | 29.5  | 0.965 | N/A    |
| 3  | 196947755 A | G         | PIGZ    | ns SNV                  | rs755420890 | N/A           | 23.8  | 0.806 | 0.0005 |
| 3  | 30671923 A  | T         | TGFBR2  | ns SNV                  | rs761231369 | U/S           | 24.9  | 0.919 | N/A    |
| 3  | 3137315 T   | A         | TRNT1   | ns SNV                  | N/A         | N/A           | 25.5  | 0.851 | N/A    |
| 4  | 83439891 C  | T         | HELQ    | ns SNV                  | rs758801143 | N/A           | 34    | 0.831 | 0.002  |
| 4  | 108089142 T | C         | LEF1    | ns SNV                  | rs775583955 | N/A           | 28.4  | 0.921 | N/A    |
| 4  | 88046847 T  | G         | PKD2    | ns SNV                  | rs772965121 | N/A           | 25.9  | 0.838 | 0.0005 |
| 4  | 25124220 A  | C         | SEPSECS | ns SNV                  | N/A         | N/A           | 27.2  | 0.935 | N/A    |
| 4  | 6301275 G   | A         | WFS1    | ns SNV                  | rs760692398 | N/A           | 26.5  | 0.862 | 0.002  |
| 4  | 99057785 C  | T         | METAP1  | ns SNV                  | N/A         | N/A           | 26.3  | 0.835 | N/A    |
| 5  | 90811089 C  | T         | ADGRV1  | ns SNV                  | rs375450242 | CIP           | 23.2  | 0.139 | 0.001  |
| 5  | 80654908 -  | CAGCGCCCC | MSH3    | nonframeshift insertion | rs747419370 | CIP           | N/A   | N/A   | N/A    |
| 5  | 16616886 G  | A         | RETREG1 | ns SNV                  | rs528532732 | CIP           | 11.63 | 0.027 | 0.0005 |
| 7  | 18027028 A  | C         | PRPS1L1 | ns SNV                  | rs762277550 | N/A           | 25.1  | 0.931 | N/A    |
| 8  | 27463698 C  | T         | CHRN/A2 | ns SNV                  | rs77710085  | CIP           | 12.21 | 0.101 | 0.0025 |
| 8  | 142877162 G | C         | CYP11B1 | ns SNV                  | rs61751149  | CIP           | 0.002 | 0.033 | 0.01   |
| 8  | 139731152 C | T         | TRAPPC9 | ns SNV                  | rs145503551 | CIP           | 20.2  | 0.049 | 0.006  |
| 8  | 26652293 C  | T         | DPYSL2  | ns SNV                  | rs779134278 | N/A           | 35    | 0.773 | N/A    |
| 8  | 24914676 C  | A         | NEFM    | ns SNV                  | rs201666371 | N/A           | 24.7  | 0.85  | 0.001  |
| 8  | 75556049 A  | G         | HNF4G   | ns SNV                  | N/A         | N/A           | 26.7  | 0.821 | N/A    |
| 9  | 710876 A    | G         | KANK1   | ns SNV                  | rs753436251 | N/A           | 25.5  | 0.887 | N/A    |
| 9  | 137463457 C | T         | PNPLA7  | ns SNV                  | rs140268990 | N/A           | 31    | 0.89  | 0.0005 |
| 9  | 82990440 T  | C         | RASEF   | ns SNV                  | N/A         | N/A           | 27    | 0.909 | N/A    |
| 10 | 60075299 G  | A         | ANK3    | ns SNV                  | rs117475706 | CIP           | 24.5  | 0.08  | N/A    |
| 10 | 53857257 C  | T         | PCDH15  | ns SNV                  | rs201137087 | CIP           | 34    | 0.818 | 0.0065 |
| 10 | 93381386 C  | T         | MYOF    | ns SNV                  | rs370493284 | N/A           | 35    | 0.76  | 0.0005 |
| 10 | 3119925 C   | T         | PFKP    | ns SNV                  | rs750120962 | N/A           | 35    | 0.817 | N/A    |
| 10 | 97042951 C  | A         | SLIT1   | ns SNV                  | rs757038852 | N/A           | 34    | 0.815 | N/A    |

|    |           |   |   |           |                      |             |               |       |       |        |
|----|-----------|---|---|-----------|----------------------|-------------|---------------|-------|-------|--------|
| 10 | 120905367 | G | A | WDR11     | ns SNV               | rs201686484 | N/A           | 34    | 0.792 | 0.003  |
| 10 | 31521176  | T | C | ZEB1      | ns SNV               | rs746075441 | N/A           | 24.7  | 0.867 | N/A    |
| 10 | 53857257  | C | T | PCDH15    | ns SNV               | rs201137087 | CIP           | 34    | 0.818 | 0.0065 |
| 11 | 71435791  | C | T | DHCR7     | ns SNV               | rs72954276  | CIP           | 0.578 | 0.255 | 0.003  |
| 11 | 64808033  | C | T | MEN1      | ns SNV               | rs607969    | CIP           | 23.7  | 0.434 | 0.0045 |
| 11 | 794782    | G | A | SLC25A22  | ns SNV               | rs142220309 | CIP           | 23.6  | 0.51  | N/A    |
| 11 | 6391623   | - | C | SMPD1     | frameshift insertion | rs756366019 | Pathogenic    | N/A   | N/A   | N/A    |
| 11 | 26537457  | A | C | ANO3      | ns SNV               | N/A         | N/A           | 27.3  | 0.871 | N/A    |
| 11 | 93759821  | C | T | C11orf54  | ns SNV               | rs181140249 | N/A           | 34    | 0.862 | 0.004  |
| 11 | 94102955  | G | A | HEPHL1    | ns SNV               | rs779789404 | N/A           | 27.1  | 0.79  | N/A    |
| 11 | 68448865  | G | T | LRP5      | ns SNV               | rs147618989 | U/S           | 24.1  | 0.842 | 0.0015 |
| 11 | 89400337  | C | T | NOX4      | ns SNV               | rs184098470 | N/A           | 33    | 0.867 | 0.0005 |
| 11 | 9847077   | T | C | SBF2      | ns SNV               | rs754241592 | N/A           | 32    | 0.945 | 0.002  |
| 12 | 21882797  | C | T | ABCC9     | ns SNV               | rs141999048 | CIP           | 21.4  | 0.371 | 0.0015 |
| 12 | 69586813  | G | A | CCT2      | ns SNV               | rs772758306 | N/A           | 32    | 0.942 | 0.0005 |
| 12 | 52490934  | A | G | KRT6A     | ns SNV               | N/A         | N/A           | 23.8  | 0.815 | N/A    |
| 12 | 52428679  | A | T | KRT75     | ns SNV               | rs192170292 | N/A           | 27.3  | 0.908 | 0.0025 |
| 12 | 21642074  | C | T | LDHB      | ns SNV               | rs200163319 | N/A           | 24.5  | 0.844 | 0.005  |
| 12 | 103706942 | T | G | STAB2     | ns SNV               | rs748243785 | N/A           | 25.8  | 0.873 | N/A    |
| 12 | 76815177  | C | T | ZDHHC17   | ns SNV               | rs763263581 | N/A           | 34    | 0.883 | N/A    |
| 13 | 102875337 | T | G | BIVM-ERCC | ns SNV               | rs368550097 | CIP           | 7.842 | 0.119 | 0.004  |
| 13 | 32338731  | A | G | BRCA2     | ns SNV               | rs117187202 | CIP           | 0.395 | 0.146 | 0.0005 |
| 13 | 32340191  | T | C | BRCA2     | ns SNV               | rs80358811  | CIP           | 0.002 | 0.14  | 0.0005 |
| 13 | 24906608  | G | A | CENPJ     | ns SNV               | rs193181742 | CIP           | 0.023 | 0.01  | 0.005  |
| 13 | 40799148  | C | G | SLC25A15  | ns SNV               | rs187685447 | CIP           | 13.64 | 0.355 | 0.0025 |
| 13 | 36879563  | T | C | SMAD9     | ns SNV               | rs397514715 | Pathogenic    | 24.8  | 0.902 | 0.0005 |
| 13 | 49551459  | C | T | RCBTB1    | ns SNV               | N/A         | N/A           | 35    | 0.981 | N/A    |
| 13 | 36879563  | T | C | SMAD9     | ns SNV               | rs397514715 | Pathogenic    | 24.8  | 0.902 | 0.0005 |
| 14 | 77299507  | G | C | POMT2     | ns SNV               | rs764015186 | CIP           | 7.404 | 0.224 | 0.0025 |
| 14 | 24607627  | G | T | GZMH      | ns SNV               | N/A         | N/A           | 25.5  | 0.886 | N/A    |
| 15 | 73367687  | G | A | HCN4      | ns SNV               | rs201375192 | CIP           | 20.5  | 0.271 | 0.0065 |
| 15 | 72346626  | C | T | HEXA      | ns SNV               | rs575121167 | CIP           | 32    | 0.711 | 0.0035 |
| 15 | 72353090  | A | T | HEXA      | ns SNV               | rs185797496 | Likely_benign | 25.6  | 0.761 | 0.005  |
| 15 | 89320863  | C | T | POLG      | ns SNV               | rs760305377 | U/S           | 33    | 0.964 | N/A    |
| 15 | 48139019  | T | G | SLC24A5   | ns SNV               | rs192454382 | Likely_benign | 27.9  | 0.814 | 0.0045 |

|    |            |   |          |                     |             |            |       |       |        |
|----|------------|---|----------|---------------------|-------------|------------|-------|-------|--------|
| 16 | 23635054 C | A | PALB2    | ns SNV              | rs75023630  | CIP        | 24.3  | 0.088 | 0.0075 |
| 16 | 72122957 G | A | PMFBP1   | stopgain            | rs140352254 | Pathogenic | 41    | N/A   | 0.0005 |
| 16 | 3979202 G  | A | ADCY9    | ns SNV              | N/A         | N/A        | 34    | 0.805 | N/A    |
| 16 | 55529843 C | T | LPCAT2   | ns SNV              | rs549291060 | N/A        | 35    | 0.898 | N/A    |
| 16 | 56870725 T | C | SLC12A3  | ns SNV              | rs749698843 | N/A        | 27.9  | 0.814 | N/A    |
| 16 | 984739 A   | C | SOX8     | ns SNV              | N/A         | N/A        | 24.9  | 0.865 | N/A    |
| 17 | 80065503 G | A | CCDC40   | ns SNV              | rs185157579 | CIP        | 7.049 | 0.051 | 0.0075 |
| 17 | 80108767 G | A | GAA      | ns SNV              | rs2229224   | CIP        | 1.285 | 0.245 | 0.0035 |
| 17 | 58206158 C | T | MKS1     | ns SNV              | rs199910690 | CIP        | 32    | 0.711 | 0.006  |
| 17 | 81935121 G | - | PYCR1    | frameshift deletion | rs758601634 | Pathogenic | N/A   | N/A   | N/A    |
| 17 | 50167954 C | T | SGCA     | ns SNV              | rs186669379 | CIP        | 23.5  | 0.864 | 0.006  |
| 17 | 48623029 C | T | HOXB9    | ns SNV              | rs753182609 | N/A        | 32    | 0.775 | 0.0045 |
| 17 | 21703291 G | C | KCNJ18   | ns SNV              | N/A         | N/A        | 26.3  | 0.947 | N/A    |
| 17 | 41480743 C | T | KRT35    | ns SNV              | rs201523783 | N/A        | 24.3  | 0.902 | 0.0005 |
| 17 | 10511876 A | G | MYH1     | ns SNV              | rs201061123 | N/A        | 22.2  | 0.882 | 0.0015 |
| 17 | 31232747 A | G | NF1      | ns SNV              | rs757222815 | U/S        | 28.8  | 0.771 | 0.0005 |
| 17 | 39107433 C | T | PLXDC1   | ns SNV              | rs757389182 | N/A        | 34    | 0.926 | N/A    |
| 17 | 50167954 C | T | SGCA     | ns SNV              | rs186669379 | CIP        | 23.5  | 0.864 | 0.006  |
| 17 | 9545244 T  | A | STX8     | ns SNV              | rs201798916 | N/A        | 28.7  | 0.796 | 0.003  |
| 18 | 31068905 G | A | DSC2     | ns SNV              | rs142410803 | CIP        | 35    | 0.499 | 0.0085 |
| 19 | 38505076 G | A | RYR1     | ns SNV              | rs566495420 | CIP        | 24.7  | 0.316 | 0.005  |
| 19 | 8090246 G  | A | FBN3     | ns SNV              | rs183278638 | N/A        | 34    | 0.798 | 0.001  |
| 19 | 3157825 T  | C | GN/A15   | ns SNV              | N/A         | N/A        | 23.3  | 0.861 | N/A    |
| 19 | 48836366 C | T | HSD17B14 | ns SNV              | rs113246661 | N/A        | 34    | 0.752 | 0.0035 |
| 20 | 3889380 C  | G | PANK2    | ns SNV              | rs199680057 | CIP        | 24.3  | 0.39  | 0.01   |
| 20 | 19886740 C | T | RIN2     | ns SNV              | rs183028833 | CIP        | 16.18 | 0.008 | 0.0025 |
| 20 | 46725912 C | A | SLC2A10  | ns SNV              | rs777604168 | CIP        | 23.7  | 0.625 | 0.002  |
| 20 | 34285586 C | T | AHCY     | ns SNV              | rs765418686 | N/A        | 24.5  | 0.785 | 0.0005 |
| 20 | 20503382 G | A | RALGAPA2 | ns SNV              | rs374993331 | N/A        | 29    | 0.865 | 0.002  |
| 20 | 17531195 C | A | BFSP1    | ns SNV              | N/A         | N/A        | 28.4  | 0.775 | 0.0005 |
| 21 | 46416553 G | A | PCNT     | ns SNV              | rs201503338 | CIP        | 8.188 | 0.011 | 0.001  |
| 22 | 26625533 C | T | CRYBA4   | stopgain            | rs199635152 | Pathogenic | 35    | N/A   | N/A    |
| 22 | 20973844 A | G | AIFM3    | ns SNV              | rs764765760 | N/A        | 24.1  | 0.826 | N/A    |
| 22 | 26628384 G | A | CRYBA4   | ns SNV              | N/A         | N/A        | 31    | 0.873 | N/A    |
| 22 | 29278078 G | T | EWSR1    | ns SNV              | N/A         | N/A        | 29.4  | 0.781 | N/A    |

|   |           |   |   |       |        |             |        |       |       |        |
|---|-----------|---|---|-------|--------|-------------|--------|-------|-------|--------|
| X | 32310266  | C | T | DMD   | ns SNV | rs148135406 | CIP    | 17.97 | 0.147 | 0.0005 |
| X | 32441307  | C | G | DMD   | ns SNV | rs200213555 | CIP    | 25.8  | 0.312 | 0.003  |
| X | 32644145  | C | T | DMD   | ns SNV | rs189143447 | CIP    | 27.4  | 0.294 | 0.0035 |
| X | 153725702 | T | A | ABCD1 | ns SNV | rs782720024 | Benign | 25.8  | 0.915 | 0.002  |

Chr: chromosome; Ref: reference; Alt: alternative; ns SNV: non-synonymous single-nucleotide variant; CIP: Conflicting\_interpretations\_of\_pathogenicity.

N/A: not applicable; U/S: Uncertain\_significance; TWB AF: Allele frequency in Taiwan Biobank.
